# Supplementary material for: A novel hydroxycinnamoyl transferase for synthesis of hydroxycinnamoyl spermine conjugates in plants
Source: PubMed Central journal article supplement (PMC6580504; doi:10.1186/s12870-019-1846-3), 2019-06-17
Supplement: 12870_2019_1846_MOESM3_ESM.pdf [file 12870_2019_1846_MOESM3_ESM.pdf]

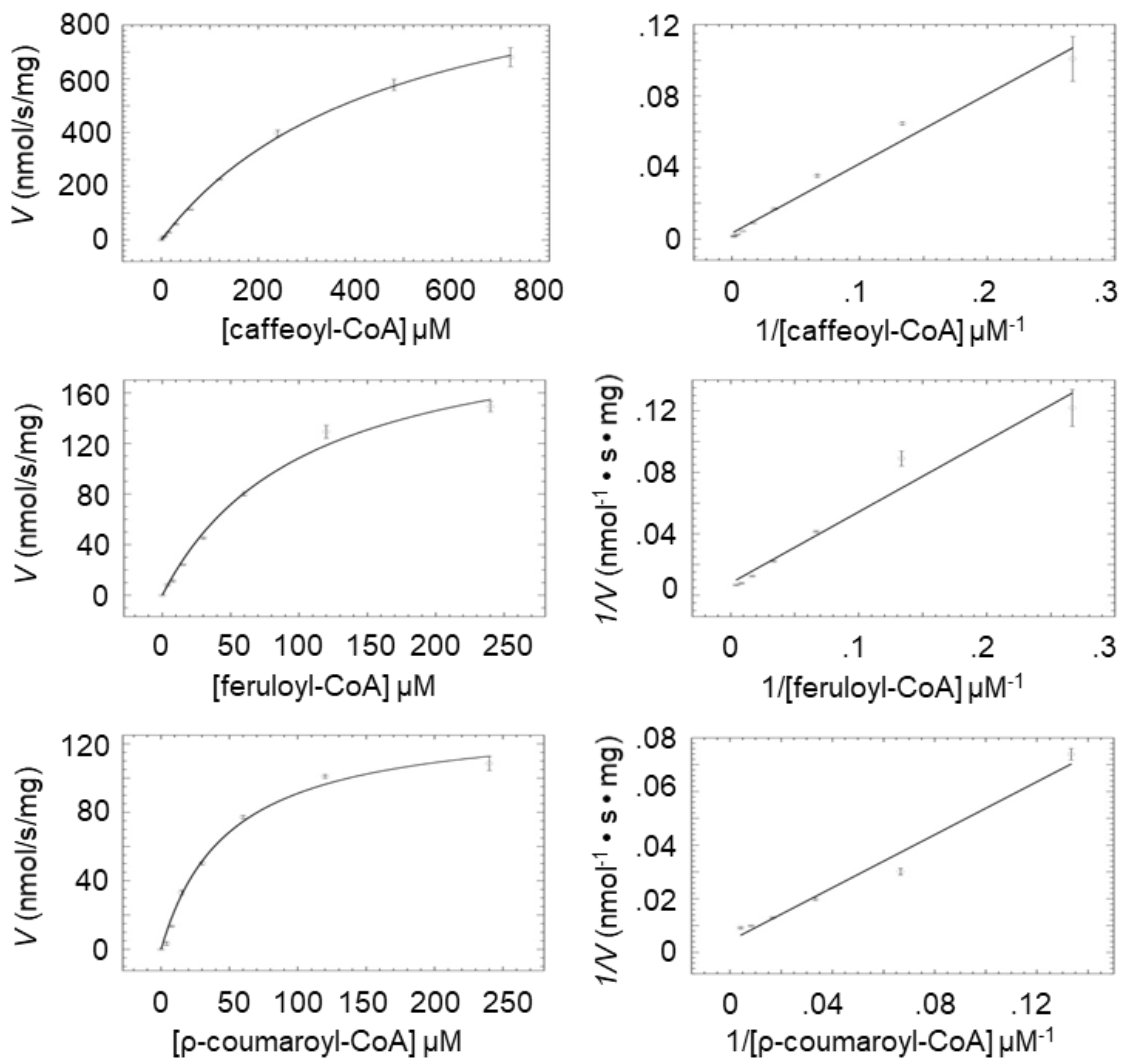

**Additional file 3 Figure S3** SrSpmHT catalytic kinetics toward hydroxycinnamoyl CoA. Data were fitted to the Michaelis–Menten equation (left). Each point represents the mean velocity plus SD from triplicate determinations. The Lineweaver-Burk plot (right) is shown to illustrate the kinetics.
