# Supplementary material for: A novel hydroxycinnamoyl transferase for synthesis of hydroxycinnamoyl spermine conjugates in plants
Source: PubMed Central journal article supplement (PMC6580504; doi:10.1186/s12870-019-1846-3), 2019-06-17
Supplement: 12870_2019_1846_MOESM5_ESM.pdf [file 12870_2019_1846_MOESM5_ESM.pdf]

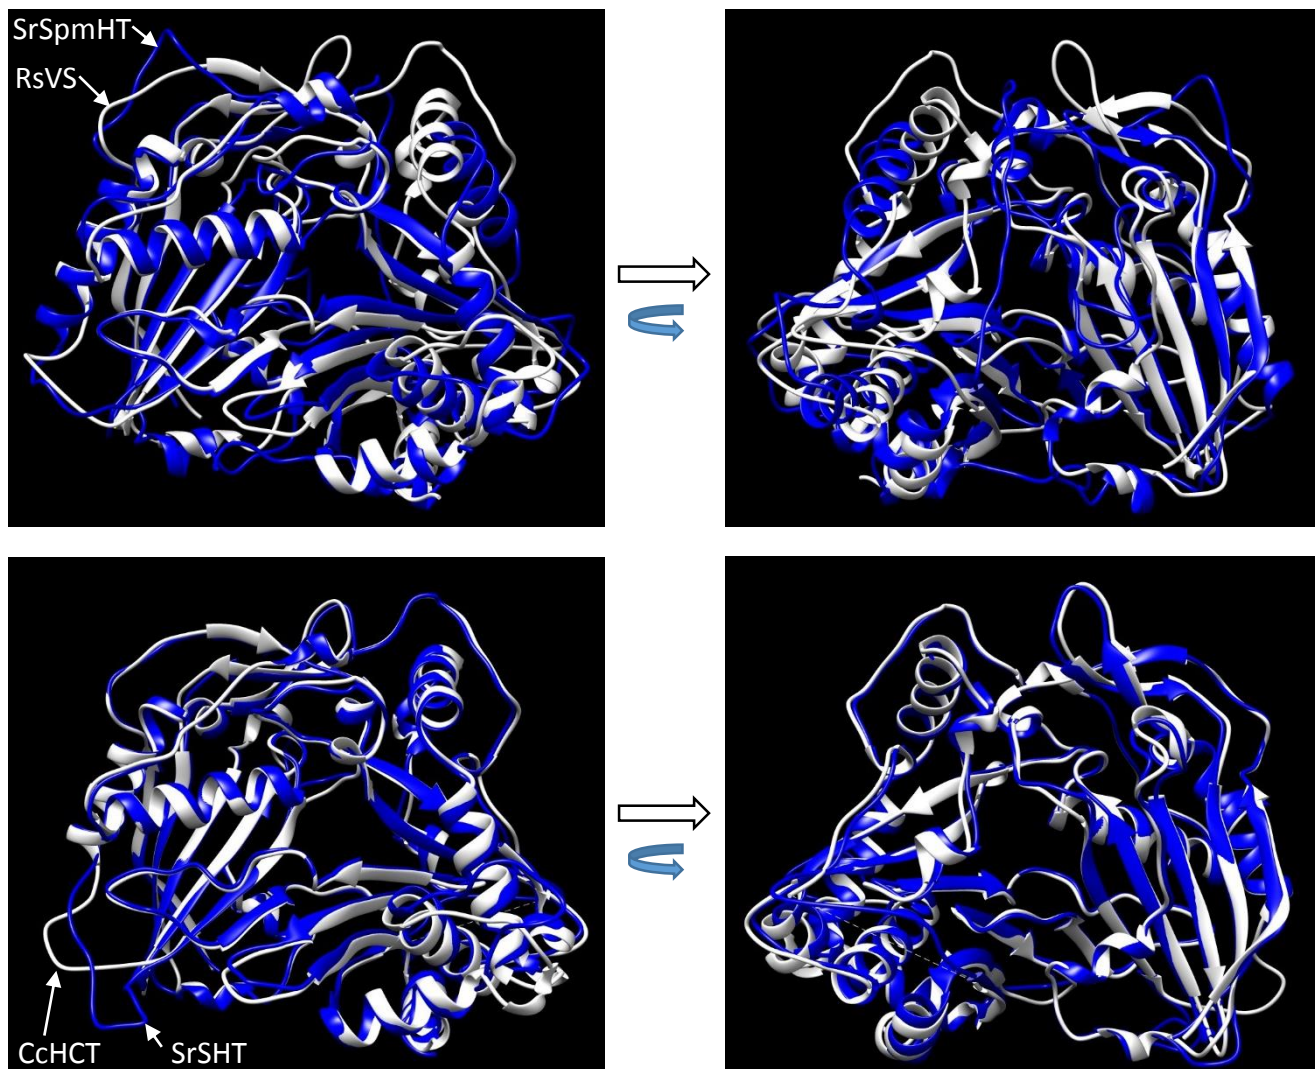

**Additional file 5 Figure S5** Structural alignment of predicted SrSpmHT, SrSHT and their modeling templates (RsVS and CcHCT). Structure modeling for SrSpmHT and SrSHT was performed with Phyre2 online service (<http://twitter.com/phyre2server>). 3D structures of all proteins were visualized using UCSF Chimera. The image was rotated 180 around a horizontal axis from front view (left) to back view (right).
