# Supplementary material for: A novel hydroxycinnamoyl transferase for synthesis of hydroxycinnamoyl spermine conjugates in plants
Source: PubMed Central journal article supplement (PMC6580504; doi:10.1186/s12870-019-1846-3), 2019-06-17
Supplement: 12870_2019_1846_MOESM6_ESM.pdf [file 12870_2019_1846_MOESM6_ESM.pdf]

**SrSpmHT**

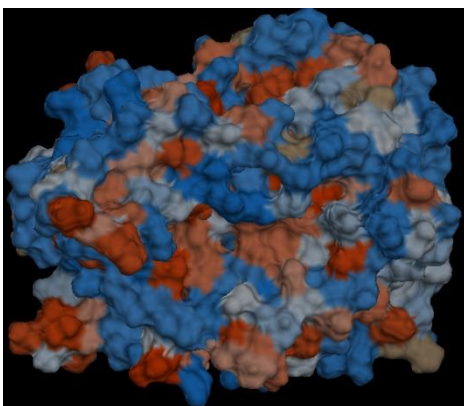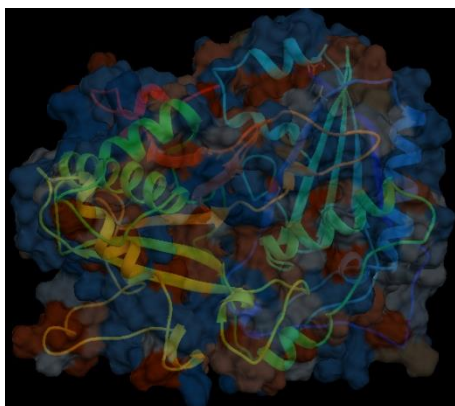

**SrSHT**

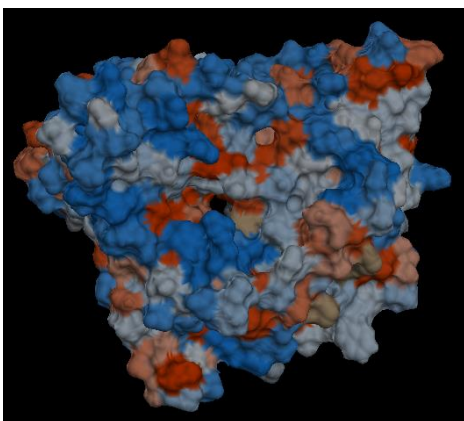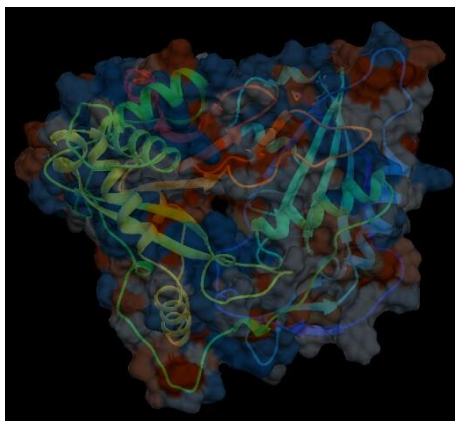

**Additional file 6 Figure S6** Spatial structure of SrSpmHT and SrSHT. Visualization was performed using UCSF Chimera .
